# Supplementary material
Source: publisher site journal article supplement (https://www.spandidos-publications.com/3320/downloadSupplementary)

Figure S1. ABCB1 overexpression in NSCLC cells. ABCB1 mRNA expression levels were detected in co-transfection with si-NC and pcDNA3.1 by RT-qPCR in A549 cells. \* $P < 0.05$ . ABCB1, ATP binding cassette subfamily B member 1; NSCLC, non-small cell lung carcinoma; RT-qPCR, reverse transcription-quantitative PCR; NC, negative control.

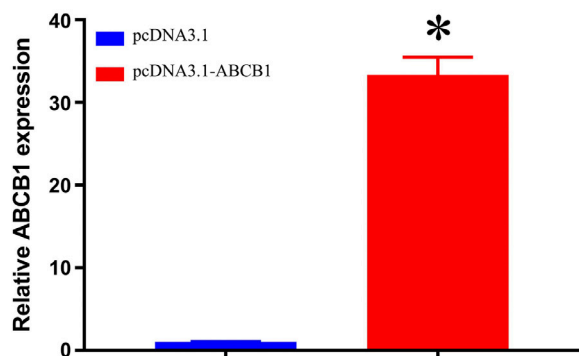

Supplement: Supplementary file 1 [file downloadSupplementary]
